# Supplementary material for: Evaluating biological activity of compounds by transcription factor activity profiling
Source: PubMed Central journal article supplement — Sci Adv. 2018 Sep 26;4(9):eaar4666. doi: 10.1126/sciadv.aar4666 (PMC6157966; doi:10.1126/sciadv.aar4666), 2018-09-26
Supplement: aar4666_SM.pdf [file aar4666_SM.pdf]

Supplementary Materials for  
**Evaluating biological activity of compounds by transcription factor activity profiling**

Alexander Medvedev, Matt Moeser, Liubov Medvedeva, Elena Martsen, Alexander Granick,  
Lydia Raines, Ming Zeng, Sergei Makarov Jr.,  
Keith A. Houck, Sergei S. Makarov\*

\*Corresponding author. Email: smak@attagene.com

Published 26 September 2018, *Sci. Adv.* **4**, eaar4666 (2018)  
DOI: 10.1126/sciadv.aar4666

**This PDF file includes:**

- Fig. S1. The effect of mETC inhibitors on the viability of assay cells (HepG2).
- Fig. S2. The effect of UPP inhibitors on the viability of assay cells and the common TFAP signatures for UPP inhibitors in HEK293 and MCF-7 cells.
- Fig. S3. The common TFAP signatures for HDAC inhibitors in HEK293 and MCF-7 cells and the effect of HDAC inhibitors on the viability of assay cells.
- Fig. S4. The effect of MTDs on the viability of assay cells.
- Fig. S5. The effect of microtubule DNA-damaging agents on the viability of assay cells.
- Fig. S6. An alternative presentation of TF responses to perturbagens as a heatmap.
- Fig. S7. The list of known mitochondria disruptors with a high ( $r > 0.800$ ) TFAP similarity to the mETC TFAP that were scored negative by the MMP assay.
- Table S1. ToxCast chemicals with a high ( $r \geq 0.800$ ) similarity to the invariant mETC TFAP.
- References (41–65)

Viability, %  
of untreated  
cells

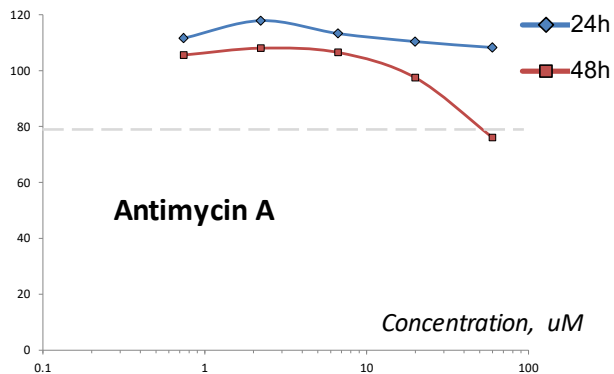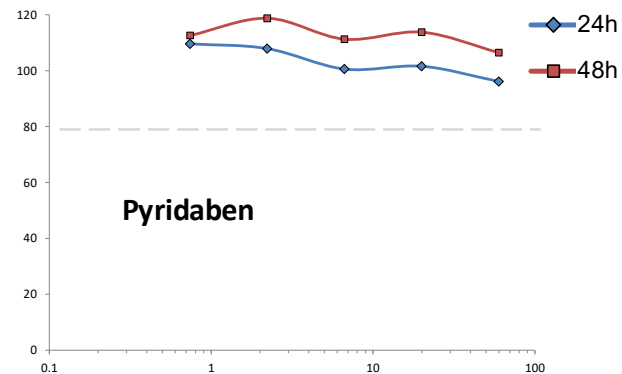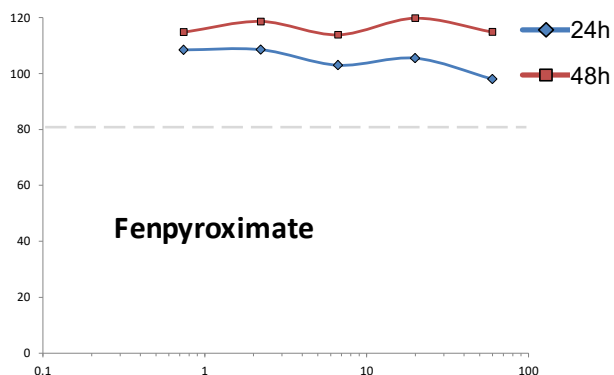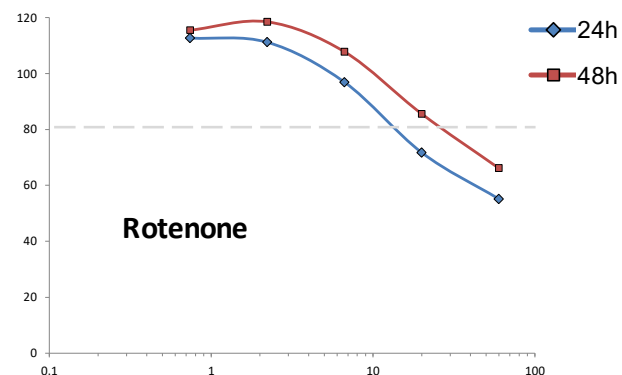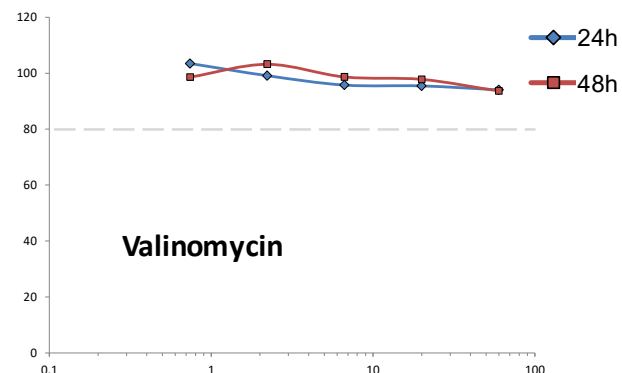

**Fig. S1. The effect of mETC inhibitors on the viability of assay cells (HepG2).** After a 24-h incubation with indicated compounds, cells were incubated for another 24 h in a compound-free medium. The viability at the 24 h and 48 h endpoints was assessed by XTT assay. Control cells were incubated with corresponding dilutions of the vehicle (DMSO). Cell viability was calculated as the percent of viable cells in compound-treated vs. vehicle-treated cells. Each point is an average of duplicate measurements. The viability threshold was set at 80%.

**A** Viability, % of untreated cells

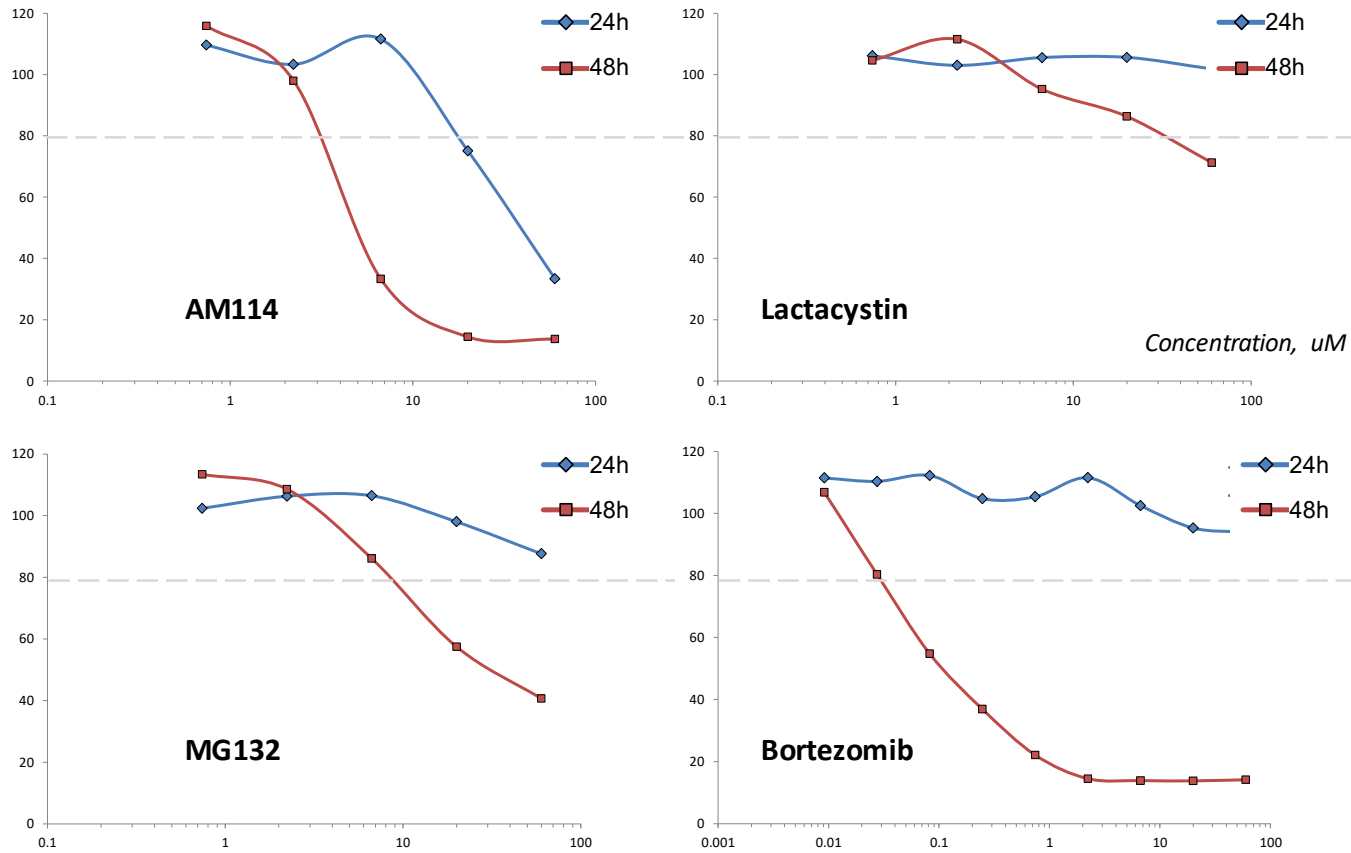

| RTU # | Name           |
|-------|----------------|
| 1     | TGFRE          |
| 2     | HNF6           |
| 3     | TCF            |
| 4     | Ebox           |
| 5     | PPAR           |
| 6     | NF1            |
| 7     | GR             |
| 8     | AP-1           |
| 9     | ISRE           |
| 10    | MTF-1          |
| 11    | STAT3          |
| 12    | TAL            |
| 13    | NF- $\kappa$ B |
| 14    | FoxA2          |
| 15    | CMV            |
| 16    | Xbp1           |
| 17    | CREB           |
| 18    | AhR            |
| 19    | EGR            |
| 20    | NRF2           |
| 21    | TA             |
| 22    | ER             |
| 23    | Oct            |
| 24    | LXR            |
| 25    | HSF-1          |
| 26    | SREBP          |
| 27    | p53            |
| 28    | BMPRE          |
| 29    | Pax6           |
| 30    | HIF-1 $\alpha$ |
| 31    | VDR            |
| 32    | ROR            |
| 33    | Ets            |
| 34    | GLI-1          |
| 35    | NRF1           |
| 36    | GATA           |
| 37    | E2F            |
| 38    | C/EBP          |
| 39    | Myb            |
| 40    | PBREM          |
| 41    | FXR            |
| 42    | AP-2           |
| 43    | RAR            |
| 44    | FoxO           |
| 45    | SOX            |
| 46    | Sp1            |
| 47    | Myc            |

**B**

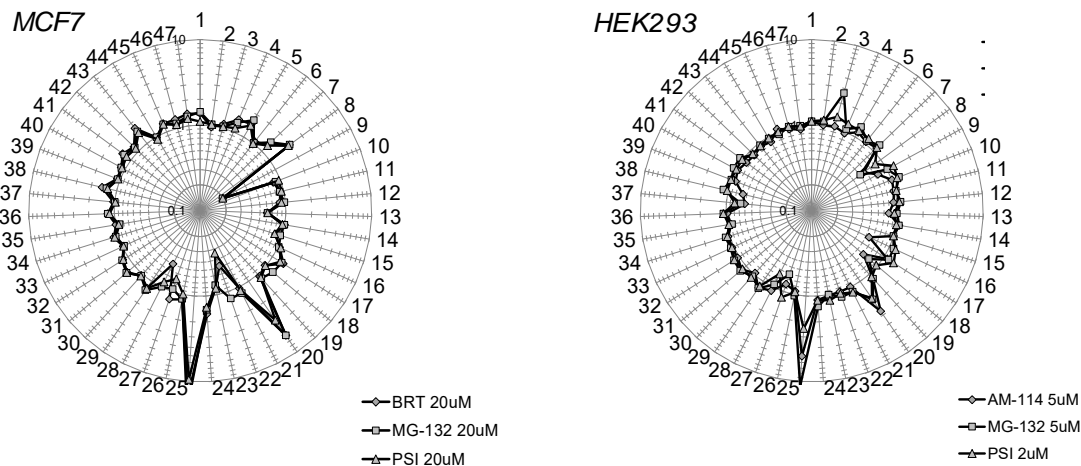

**Fig. S2. The effect of UPP inhibitors on the viability of assay cells and the common TFAP signatures for UPP inhibitors in HEK293 and MCF-7 cells. A.** The effect of UPP inhibitors on the viability of assay cells. The viability of HepG2 cells was assessed as described by fig. S1 legend. **B.** The common TFAP signatures for UPP inhibitors in different cell types. The signatures in HEK293 and MCF-7 cells for the indicated UPP inhibitors were obtained using the protocol for HepG2 cells.

**A**

MCF7

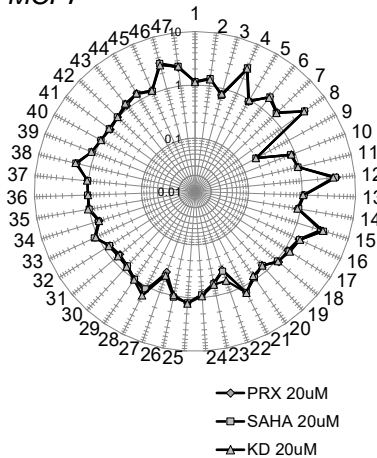

HEK293

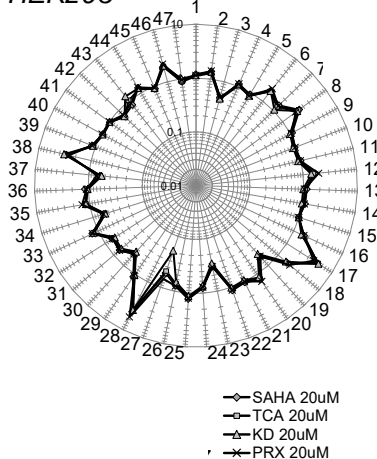

| RTU # | Name           |
|-------|----------------|
| 1     | TGFRE          |
| 2     | HNF6           |
| 3     | TCF            |
| 4     | Ebox           |
| 5     | PPAR           |
| 6     | NF1            |
| 7     | GR             |
| 8     | AP-1           |
| 9     | ISRE           |
| 10    | MTF-1          |
| 11    | STAT3          |
| 12    | TAL            |
| 13    | NF- $\kappa$ B |
| 14    | FoxA2          |
| 15    | CMV            |
| 16    | Xbp1           |
| 17    | CREB           |
| 18    | AhR            |
| 19    | EGR            |
| 20    | NRF2           |
| 21    | TA             |
| 22    | ER             |
| 23    | Oct            |
| 24    | LXR            |
| 25    | HSF-1          |
| 26    | SREBP          |
| 27    | p53            |
| 28    | BMPRE          |
| 29    | Pax6           |
| 30    | HIF-1 $\alpha$ |
| 31    | VDR            |
| 32    | ROR            |
| 33    | Ets            |
| 34    | GLI-1          |
| 35    | NRF1           |
| 36    | GATA           |
| 37    | E2F            |
| 38    | C/EBP          |
| 39    | Myb            |
| 40    | PBREM          |
| 41    | FXR            |
| 42    | AP-2           |
| 43    | RAR            |
| 44    | FoxO           |
| 45    | SOX            |
| 46    | Sp1            |
| 47    | Myc            |

**B**Viability, %  
of untreated  
cells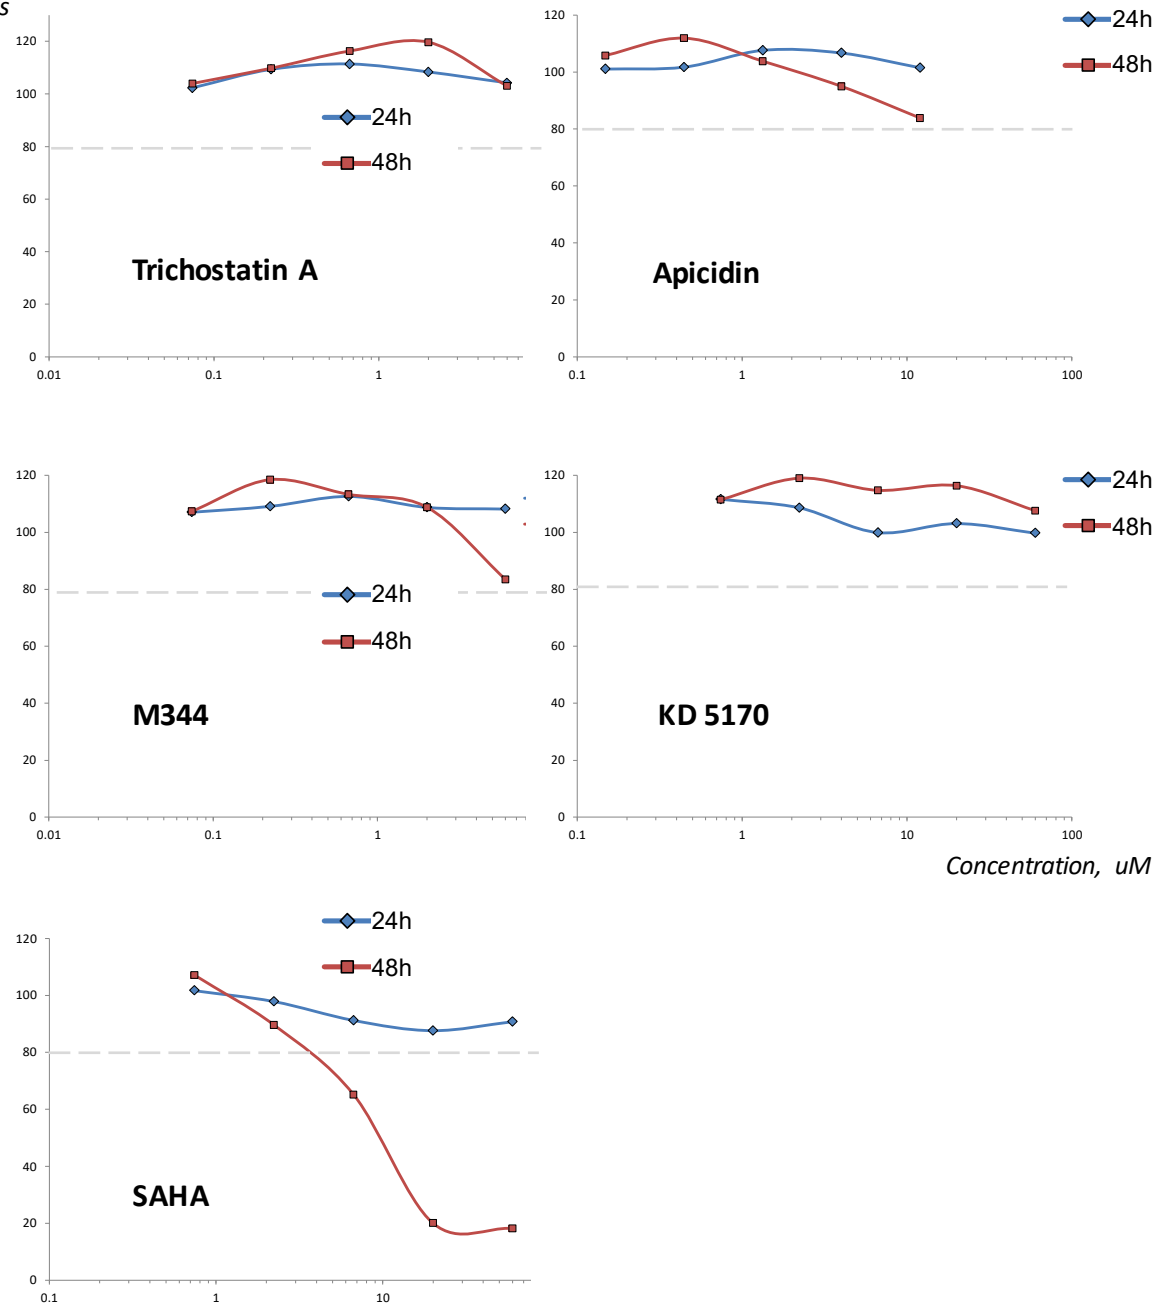

**Fig. S3. The common TFAP signatures for HDAC inhibitors in HEK293 and MCF-7 cells and the effect of HDAC inhibitors on the viability of assay cells. A.** The common TFAP signatures for HDAC inhibitors in different cell types. The signatures for SAHA, Trichostatin A (TCA), Pyroxamide (PRX), and KD5170 (KD) were obtained in HEK293 and MCF-7 cells using the protocol for HepG2 cells. **B.** The effect of HDAC inhibitors on the viability of assay cells. The viability of HepG2 cells was assessed as described by fig. S1 legend.

Viability, %  
of untreated  
cells

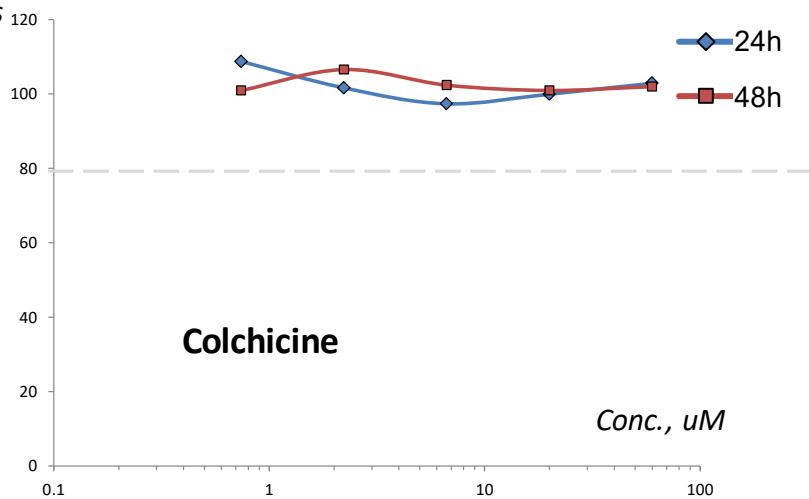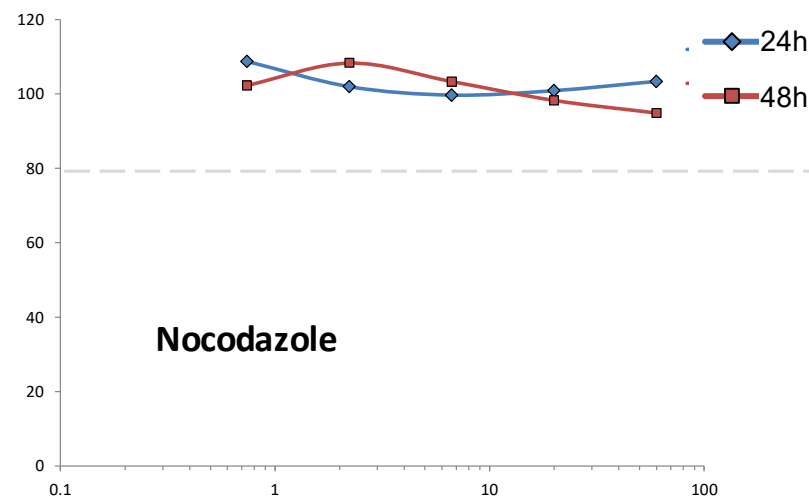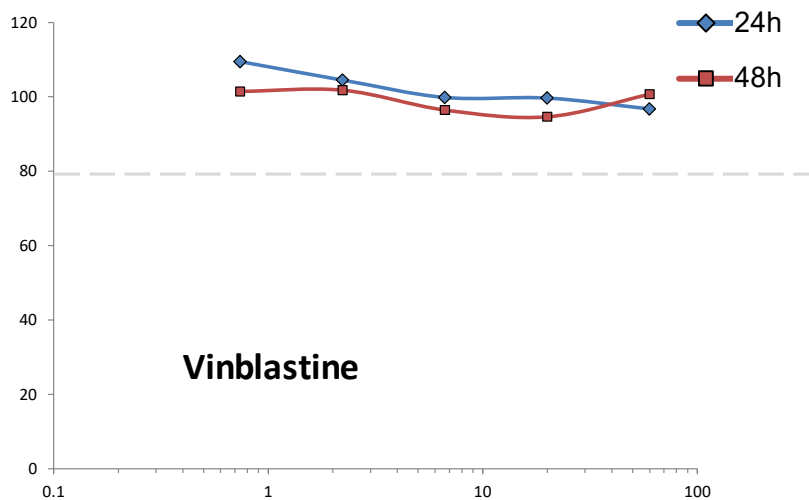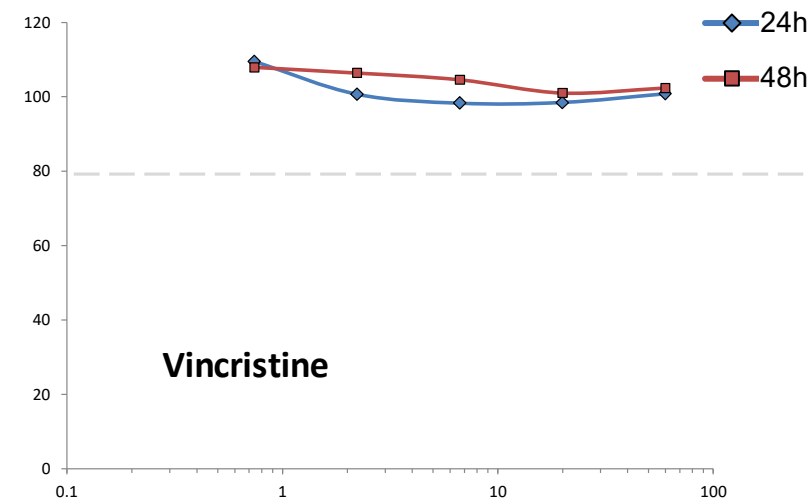

Fig. S4. The effect of MTDs on the viability of assay cells. The viability of HepG2 cells was assessed as described by fig. S1 legend.

Viability, %  
of untreated  
cells

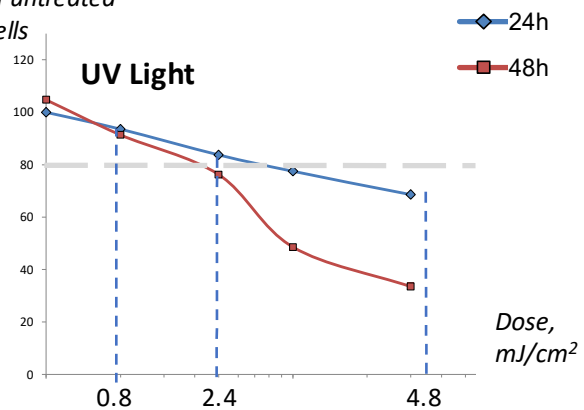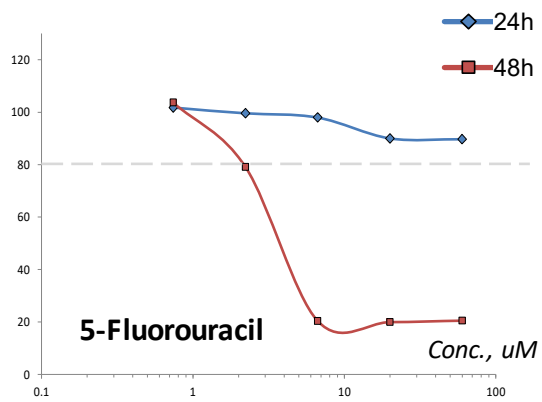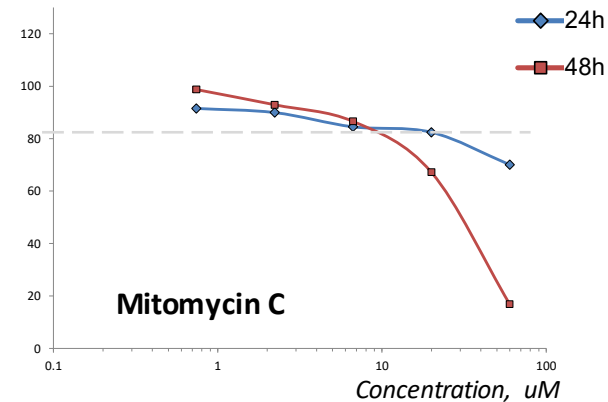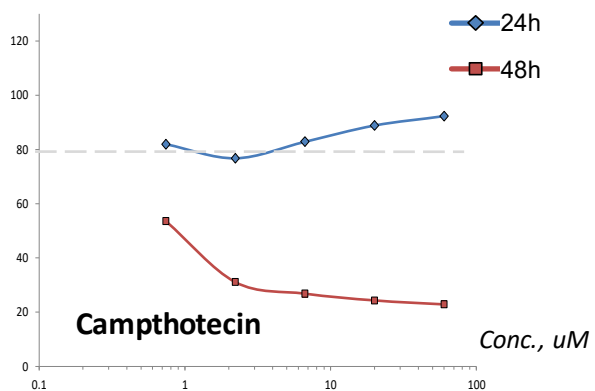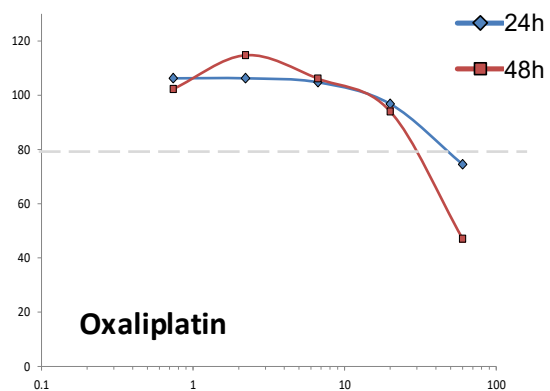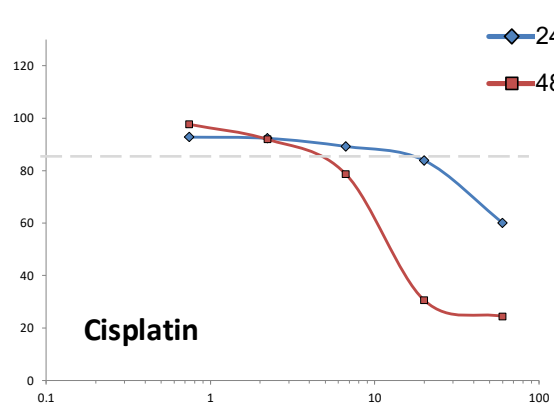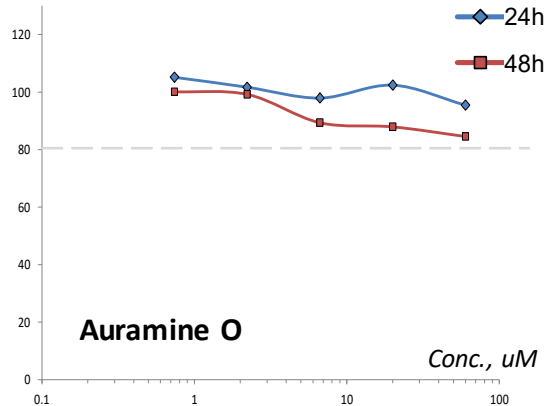

**Fig. S5.** The effect of microtubule DNA-damaging agents on the viability of assay cells. The viability of HepG2 cells was assessed as described by fig. S1 legend.

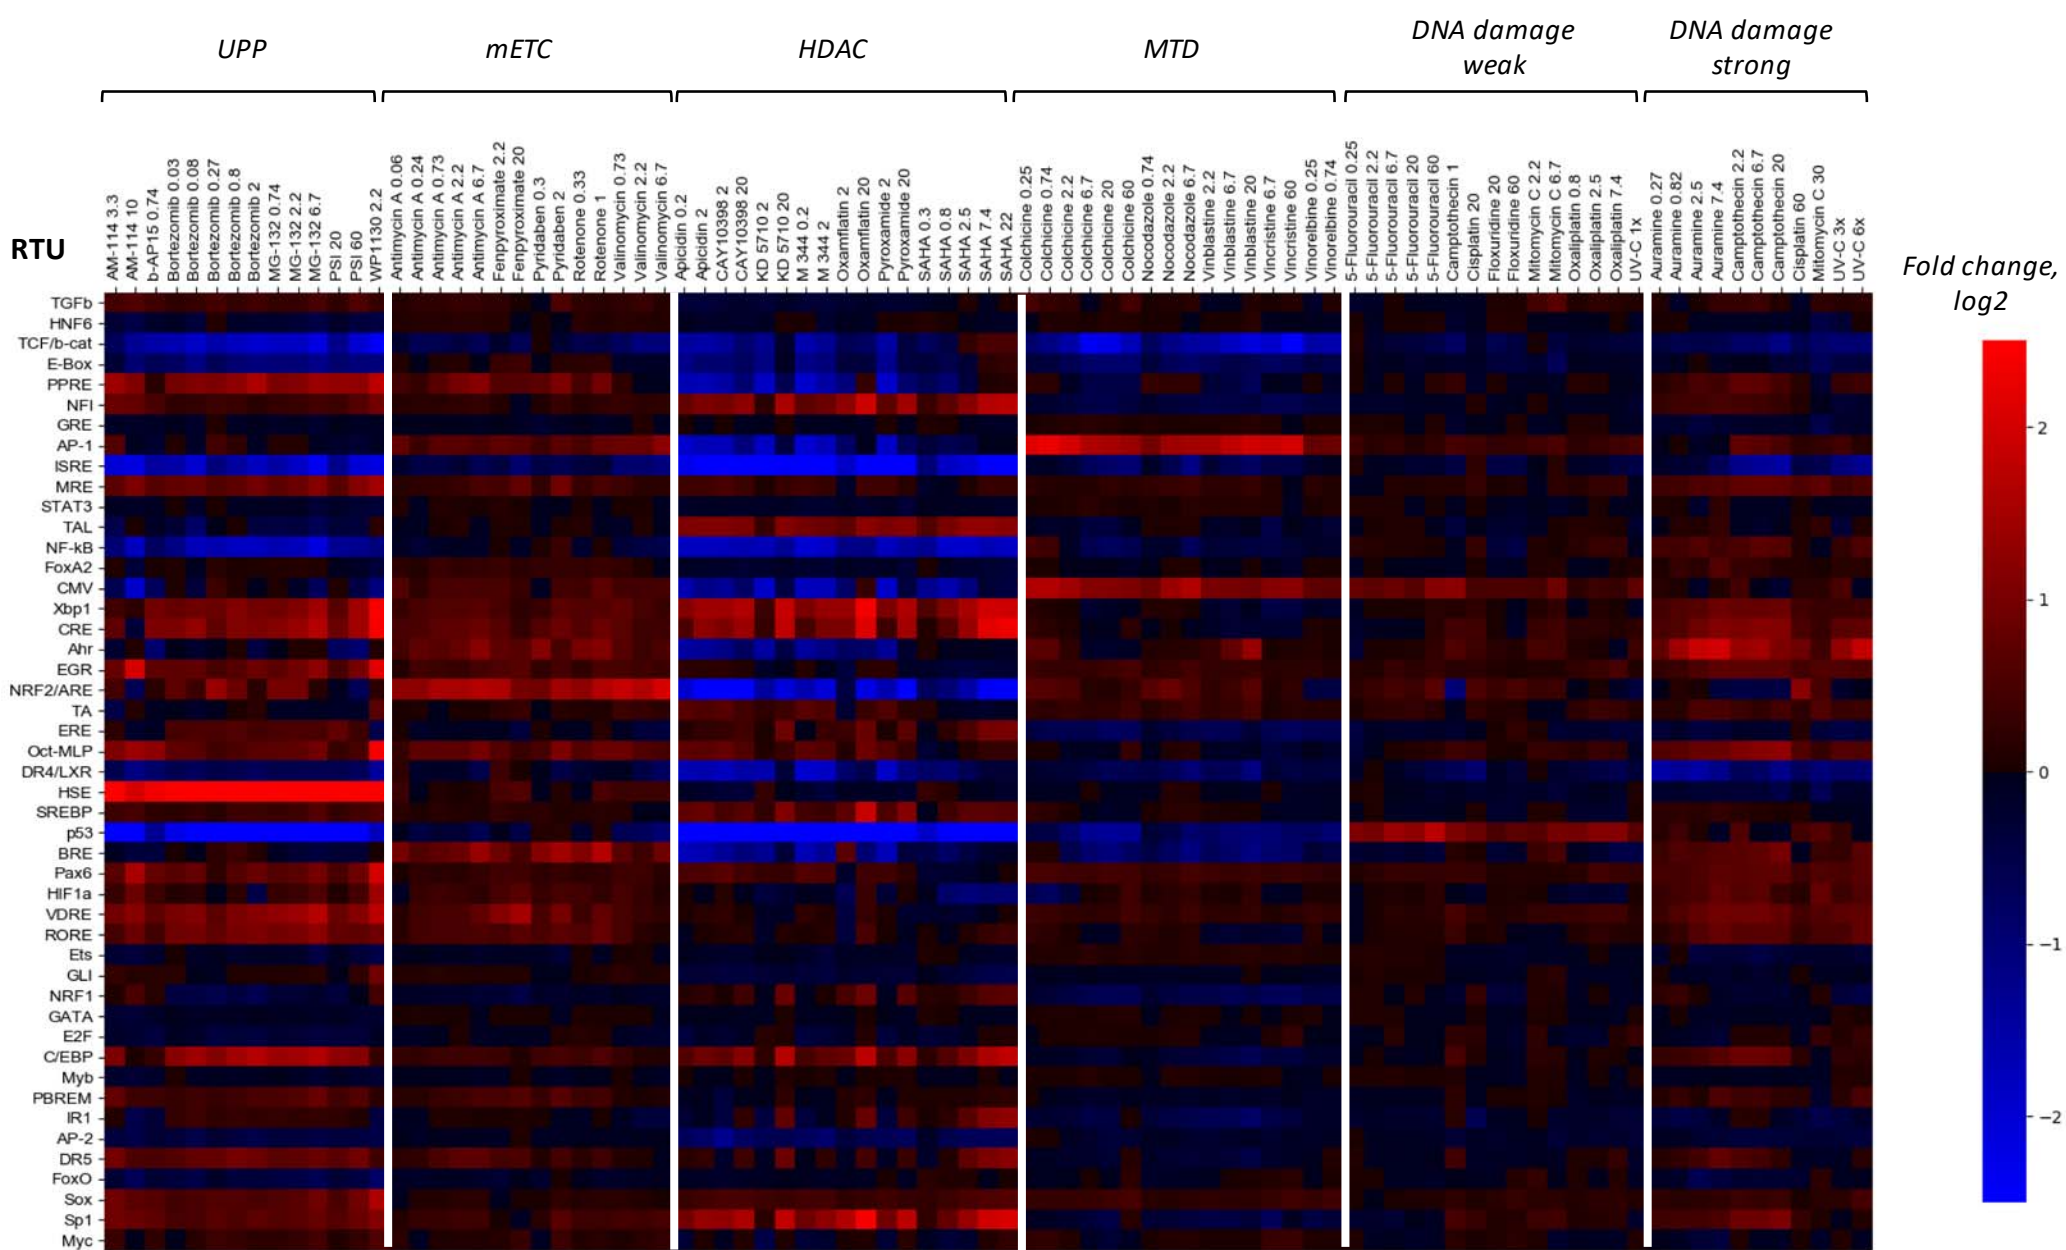

**Fig. S6. An alternative presentation of TF responses to perturbagens as a heatmap.** The aggregate heatmap shows representative TFAPs for perturbagens of different classes (shown as radial graphs by Figs. 2-4 of the main text).

**A**

Retrieved MMP-negative chemicals with  $r > 0.800$  that are known as mitochondria perturbagens

- Nitrofurazone (ref. 41);
- Fenitrothion(42);
- Diethyl maleate(43);
- Phorate(44);
- Fenazaquin (45);
- Dichlorvos(46);
- Cisplatin(47);
- Tacrine(48);
- Malathion (49);
- Clomipramine(50);
- Azinphos-methyl (51);
- Nilutamide (52);
- 2-Chloroacetophenone (chlorophenacyl) (53);
- 2-hydroxyethyl acrylate (54);
- Dibutyl phthalate (55);
- Eugenol (56);
- Thiophanate-methyl (57, 58);
- Mancozeb (59);
- Dodecyl trimethylammonium (60);
- Azoxystrobin (26, 61);
- Fenoxycarb (62);
- Kresoxim-methyl (27);
- Alachlor (63);
- Prochloraz (64);
- Dicyclohexylcarbodiimide(65).

**B**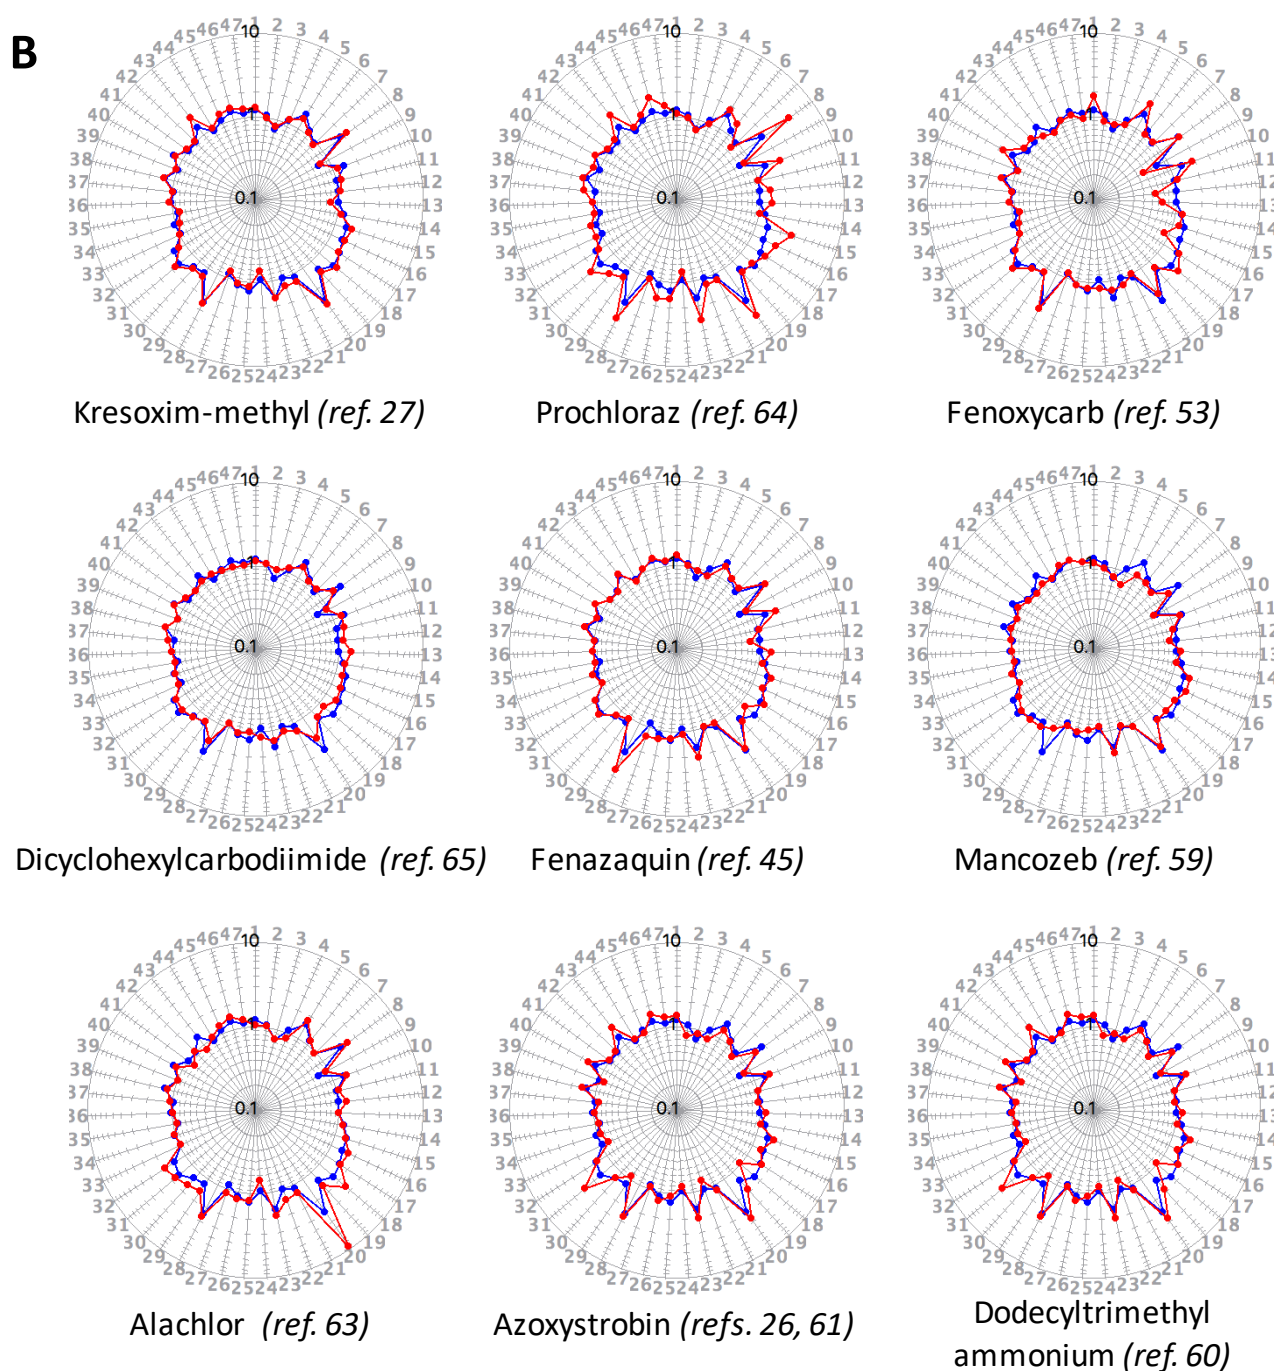

**Fig. S7. The list of known mitochondria disruptors with a high ( $r > 0.800$ ) TFAP similarity to the mETC TFAP that were scored negative by the MMP assay. A.** The list of known mitochondria disruptors with a high ( $r > 0.800$ ) TFAP similarity to the mETC TFAP that were scored negative by the MMP assay. The literature references characterizing the chemicals' effects at mitochondria in mammalian cells. **B.** Representative examples of TFAPs for known mitochondria disruptors. An overlay with the invariant mETC TFAP.



**Table S1. ToxCast chemicals with a high ( $r \geq 0.800$ ) similarity to the invariant mETC TFAP.** The dataset of TFAPs for 2,793 ToxCast chemicals was queried using the invariant mETC TFAP. The query retrieved 199 chemicals with the TFAP similarity  $r \geq 0.800$  (Fig. 5). The TFAPs for many chemicals were retrieved more than once at multiple concentrations. The redundant signatures are not listed here. The HitCall column indicates the matches with the data by the MMP assay (1=yes; 0=no). The asterisks mark the false-negatives of the MMP assay (known from the literature mitochondria disruptors). For the references, see fig. S7.

| #  | Chemical                                 | Conc. [uM] | Pearson correlation with the mETC TFAP, $r$ | CASRN       | MMP assay hitCall |
|----|------------------------------------------|------------|---------------------------------------------|-------------|-------------------|
| 1  | Bisphenol A glycidyl methacrylate        | 22.2       | 0.939                                       | 1565-94-2   | 1                 |
| 2  | Triclosan                                | 22.2       | 0.936                                       | 3380-34-5   | 1                 |
| 3  | Sweep                                    | 200.0      | 0.927                                       | 1918-18-9   | 1                 |
| 4  | Rotenone                                 | 2.0        | 0.917                                       | 83-79-4     | 1                 |
| 5  | Pyridaben                                | 2.0        | 0.916                                       | 96489-71-3  | 1                 |
| 6  | Fluorosalan                              | 7.4        | 0.913                                       | 4776-06-1   | 1                 |
| 7  | Prochloraz                               | 20.0       | 0.912                                       | 67747-09-5  | 0*                |
| 8  | Fenitrothion                             | 100.0      | 0.912                                       | 122-14-5    | 0*                |
| 9  | Ioxynil                                  | 200.0      | 0.909                                       | 1689-83-4   | 1                 |
| 10 | Dinoseb                                  | 66.7       | 0.908                                       | 88-85-7     | 1                 |
| 11 | Dazomet                                  | 100.0      | 0.907                                       | 533-74-4    | 0                 |
| 12 | Anilazine                                | 100.0      | 0.906                                       | 101-05-3    | 0                 |
| 13 | Alachlor                                 | 20uM       | 0.906                                       | 15972-60-8  | 0*                |
| 14 | Ipcnazole                                | 22.2       | 0.906                                       | 125225-28-7 | 1                 |
| 15 | Hydroxyflutamide                         | 200.0      | 0.904                                       | 52806-53-8  | 1                 |
| 16 | Fenamidone                               | 100.0      | 0.902                                       | 161326-34-7 | 1                 |
| 17 | Mifepristone                             | 66.7       | 0.902                                       | 84371-65-3  | 1                 |
| 18 | Fipronil                                 | 20uM       | 0.902                                       | 120068-37-3 | 1                 |
| 19 | Besoprodil                               | 200.0      | 0.902                                       | 253450-09-8 | 0                 |
| 20 | Triclocarban                             | 66.7       | 0.901                                       | 101-20-2    | 1                 |
| 21 | Triethyltin bromide                      | 7.4        | 0.901                                       | 2767-54-6   | 1                 |
| 22 | 1-Octen-3-ol                             | 200.0      | 0.900                                       | 3391-86-4   | 0                 |
| 23 | Norflurazon                              | 33.0       | 0.898                                       | 27314-13-2  | 0                 |
| 24 | Dinocap                                  | 7.4        | 0.897                                       | 39300-45-3  | 1                 |
| 25 | Flutamide                                | 66.7       | 0.896                                       | 13311-84-7  | 1                 |
| 26 | N-Isopropyl-N'-phenyl-p-phenylenediamine | 22.2       | 0.896                                       | 101-72-4    | 0                 |
| 27 | Azoxystrobin                             | 66.7       | 0.894                                       | 131860-33-8 | 0*                |
| 28 | Methenamine                              | 2.5        | 0.893                                       | 100-97-0    | 0                 |
| 29 | Z-Tetrachlorvinphos                      | 66.7       | 0.892                                       | 22248-79-9  | 1                 |
| 30 | Diethyl maleate                          | 200.0      | 0.892                                       | 141-05-9    | 0*                |
| 31 | Bifenazate                               | 100.0      | 0.891                                       | 149877-41-8 | 1                 |
| 32 | Trifloxystrobin                          | 20.0       | 0.891                                       | 141517-21-7 | 1                 |
| 33 | Metconazole                              | 66.7       | 0.890                                       | 125116-23-6 | 1                 |
| 34 | Nilutamide                               | 200.0      | 0.889                                       | 63612-50-0  | 0*                |
| 35 | Indoxacarb                               | 10.9       | 0.887                                       | 173584-44-6 | 1                 |
| 36 | Kresoxim-methyl                          | 22.2       | 0.886                                       | 143390-89-0 | 0*                |
| 37 | Picoxystrobin                            | 22.2       | 0.885                                       | 117428-22-5 | 1                 |
| 38 | Celecoxib                                | 20.0       | 0.883                                       | 169590-42-5 | 1                 |
| 39 | Fenoxycarb                               | 20.0       | 0.882                                       | 72490-01-8  | 0*                |
| 40 | Methyl trans-styryl ketone               | 66.7       | 0.882                                       | 1896-62-4   | 0                 |
| 41 | 1,1-Dimethoxy-3,7-dimethylocta-2,6-diene | 200.0      | 0.881                                       | 7549-37-3   | 0                 |
| 42 | Parathion                                | 100.0      | 0.880                                       | 56-38-2     | 1                 |
| 43 | Troglitazone                             | 22.0       | 0.879                                       | 97322-87-7  | 1                 |
| 44 | 4,4'-(4-Methylpentane-2,2-diyl)diphenol  | 22.2       | 0.879                                       | 6807-17-6   | 1                 |
| 45 | Profenofos                               | 13.2       | 0.877                                       | 41198-08-7  | 1                 |
| 46 | Methyl red                               | 7.4        | 0.876                                       | 493-52-7    | 0                 |
| 47 | Trichlorfon                              | 100.0      | 0.875                                       | 52-68-6     | 0                 |
| 48 | 2-tert-Butyl-4-methoxyphenol             | 200.0      | 0.875                                       | 121-00-6    | 1                 |
| 49 | Butralin                                 | 48.1       | 0.874                                       | 33629-47-9  | 0                 |
| 50 | Oxyfluorfen                              | 100.0      | 0.872                                       | 42874-03-3  | 1                 |
| 51 | 2,6-Di-tert-butyl-4-nitrophenol          | 22.2       | 0.871                                       | 728-40-5    | 1                 |

| #   | Chemical                                   | Conc. [uM] | Pearson correlation with the mETC TFAP, $r$ | CASRN       | MMP assay hitCall |
|-----|--------------------------------------------|------------|---------------------------------------------|-------------|-------------------|
| 52  | 4-Ethenylphenyl acetate                    | 200.0      | 0.870                                       | 2628-16-2   | 0                 |
| 53  | Etridiazole                                | 100.0      | 0.870                                       | 2593-15-9   | 0                 |
| 54  | 1-Chloro-3,3-dimethyl-butan-2-one          | 66.7       | 0.870                                       | 13547-70-1  | 0                 |
| 55  | Flusilazole                                | 33.0       | 0.868                                       | 85509-19-9  | 1                 |
| 56  | Rhodamine 6G                               | 2.5        | 0.868                                       | 989-38-8    | 1                 |
| 57  | Dodecyltrimethylammonium chloride          | 7.4        | 0.867                                       | 112-00-5    | 0*                |
| 58  | Methyl isothiocyanate                      | 100.0      | 0.867                                       | 556-61-6    | 0                 |
| 59  | Mancozeb                                   | 22.0       | 0.867                                       | 8018-01-7   | 0*                |
| 60  | Thiophanate-methyl                         | 100.0      | 0.865                                       | 23564-05-8  | 0*                |
| 61  | Bisphenol AF                               | 22.2       | 0.865                                       | 1478-61-1   | 1                 |
| 62  | Cyproterone acetate                        | 66.7       | 0.862                                       | 427-51-0    | 1                 |
| 63  | Oxadiazon                                  | 20.0       | 0.862                                       | 19666-30-9  | 1                 |
| 64  | Bisphenol B                                | 66.7       | 0.861                                       | 77-40-7     | 1                 |
| 65  | Eugenol                                    | 200.0      | 0.861                                       | 97-53-0     | 0*                |
| 66  | Chlorethoxyfos                             | 100.0      | 0.860                                       | 54593-83-8  | 1                 |
| 67  | 1-(4-Methoxyphenyl)-1-pentene-3-one        | 66.7       | 0.857                                       | 104-27-8    | 0                 |
| 68  | Nitrofurazone                              | 200.0      | 0.856                                       | 59-87-0     | 0*                |
| 69  | S-Metolachlor                              | 200.0      | 0.856                                       | 87392-12-9  | 0                 |
| 70  | Propyzamide                                | 100.0      | 0.856                                       | 23950-58-5  | 0                 |
| 71  | Propargite                                 | 4.8        | 0.856                                       | 2312-35-8   | 1                 |
| 72  | Clorophene                                 | 22.0       | 0.855                                       | 120-32-1    | 1                 |
| 73  | 4-Propylphenol                             | 66.7       | 0.852                                       | 645-56-7    | 1                 |
| 74  | Dimethomorph                               | 33.0       | 0.851                                       | 110488-70-5 | 0                 |
| 75  | 2-Cyanoethyl prop-2-enoate                 | 66.7       | 0.850                                       | 106-71-8    | 0                 |
| 76  | Flufenacet                                 | 100.0      | 0.850                                       | 142459-58-3 | 0                 |
| 77  | Phorate                                    | 200.0      | 0.849                                       | 298-02-2    | 0*                |
| 78  | TNP-470                                    | 200.0      | 0.848                                       | 129298-91-5 | 0                 |
| 79  | 7-Diethylamino-4-methylcoumarin            | 200.0      | 0.848                                       | 91-44-1     | 1                 |
| 80  | Bisphenol A                                | 100.0      | 0.848                                       | 80-05-7     | 1                 |
| 81  | Tetramethrin                               | 33.0       | 0.847                                       | 7696-12-0   | 1                 |
| 82  | Fluoxastrobin                              | 3.9        | 0.847                                       | 361377-29-9 | 1                 |
| 83  | Diprop-2-en-1-yl (2Z)-but-2-enedioate      | 22.2       | 0.846                                       | 999-21-3    | 0                 |
| 84  | Hexythiazox                                | 33.0       | 0.846                                       | 78587-05-0  | 1                 |
| 85  | Silwet L77                                 | 7.4        | 0.845                                       | 27306-78-1  | 1                 |
| 86  | 2-Chloro-4-phenylphenol                    | 66.7       | 0.845                                       | 92-04-6     | 1                 |
| 87  | Chlorfenapyr                               | 2.5        | 0.844                                       | 122453-73-0 | 1                 |
| 88  | 2,5-Di-tert-butylbenzene-1,4-diol          | 66.7       | 0.843                                       | 88-58-4     | 1                 |
| 89  | 2-Chloro-N-phenylacetamide                 | 22.2       | 0.843                                       | 587-65-5    | 0                 |
| 90  | Binapacryl                                 | 22.2       | 0.842                                       | 485-31-4    | 1                 |
| 91  | 2-Hydroxyethyl acrylate                    | 200.0      | 0.842                                       | 818-61-1    | 0*                |
| 92  | Nelivaptan                                 | 66.0       | 0.840                                       | 439687-69-1 | 0                 |
| 93  | 3,4,5,6-Tetrachloro-2-pyridinecarbonitrile | 2.5        | 0.840                                       | 17824-83-8  | 1                 |
| 94  | Prallethrin                                | 33.0       | 0.840                                       | 23031-36-9  | 1                 |
| 95  | Dodecyltrimethylammonium bromide           | 22.2       | 0.839                                       | 1119-94-4   | 1                 |
| 96  | Phosalone                                  | 100.0      | 0.839                                       | 2310-17-0   | 1                 |
| 97  | Bis(2-ethylhexyl) phosphate                | 66.7       | 0.838                                       | 298-07-7    | 1                 |
| 98  | Thiazopyr                                  | 20uM       | 0.838                                       | 117718-60-2 | 0                 |
| 99  | Dibutyl phthalate                          | 100.0      | 0.838                                       | 84-74-2     | 0*                |
| 100 | Benzalkonium chloride                      | 7.4        | 0.837                                       | 8001-54-5   | 1                 |

Table S1. (continued)

| #   | Chemical                                                              | Conc. [uM] | Pearson correlation with the mETC TFAP, <i>r</i> | CASRN       | MMP assay hitCall |
|-----|-----------------------------------------------------------------------|------------|--------------------------------------------------|-------------|-------------------|
| 101 | Famoxadone                                                            | 6.2        | 0.837                                            | 131807-57-3 | 1                 |
| 102 | Hexachlorophene                                                       | 7.4        | 0.837                                            | 70-30-4     | 1                 |
| 103 | 3,7-Dimethyl-2,6-octadienal                                           | 200.0      | 0.836                                            | 5392-40-5   | 0                 |
| 104 | Dicyclohexyl phthalate                                                | 7.4        | 0.836                                            | 84-61-7     | 1                 |
| 105 | Linuron                                                               | 100.0      | 0.836                                            | 330-55-2    | 1                 |
| 106 | Tolazamide                                                            | 2.5        | 0.836                                            | 1156-19-0   | 0                 |
| 107 | Resmethrin                                                            | 20.0       | 0.835                                            | 10453-86-8  | 1                 |
| 108 | Bisphenol F                                                           | 200.0      | 0.835                                            | 620-92-8    | 1                 |
| 109 | 4-Hexylresorcinol                                                     | 66.7       | 0.835                                            | 136-77-6    | 1                 |
| 110 | Tetradonium bromide                                                   | 22.2       | 0.835                                            | 1119-97-7   | 0                 |
| 111 | Metolachlor                                                           | 100.0      | 0.835                                            | 51218-45-2  | 0                 |
| 112 | 2,2',2''-[Methanetriyltris(benzene-4,1-diyloxy)methanediy]]trioxirane | 7.4        | 0.834                                            | 66072-38-6  | 0                 |
| 113 | Flutolanil                                                            | 100.0      | 0.834                                            | 66332-96-5  | 1                 |
| 114 | Triadimenol                                                           | 17.2       | 0.834                                            | 55219-65-3  | 0                 |
| 115 | Novaluron                                                             | 100.0      | 0.833                                            | 116714-46-6 | 0                 |
| 116 | Allethrin                                                             | 22.0       | 0.833                                            | 584-79-2    | 1                 |
| 117 | Tiratricol                                                            | 200.0      | 0.833                                            | 51-24-1     | 0                 |
| 118 | 2-Chloroacetophenone                                                  | 22.2       | 0.832                                            | 532-27-4    | 0*                |
| 119 | Difenconazole                                                         | 6.3        | 0.832                                            | 119446-68-3 | 1                 |
| 120 | Dichlorvos                                                            | 100.0      | 0.832                                            | 62-73-7     | 0*                |
| 121 | Bendiocarb                                                            | 100.0      | 0.831                                            | 22781-23-3  | 0                 |
| 122 | Ketoconazole                                                          | 20.0       | 0.831                                            | 65277-42-1  | 1                 |
| 123 | Cetylpyridinium bromide                                               | 7.4        | 0.831                                            | 140-72-7    | 1                 |
| 124 | 3-(Chloromethyl)pyridine hydrochloride                                | 200.0      | 0.827                                            | 6959-48-4   | 0                 |
| 125 | 2,2'-Methylenebis(ethyl-6-tert-butylphenol)                           | 22.2       | 0.827                                            | 88-24-4     | 1                 |
| 126 | Chlorpyrifos oxon                                                     | 100.0      | 0.827                                            | 5598-15-2   | 1                 |
| 127 | Cyazofamid                                                            | 23.8       | 0.827                                            | 120116-88-3 | 1                 |
| 128 | Oxycarboxin                                                           | 22.2       | 0.827                                            | 5259-88-1   | 0                 |
| 129 | Fenoxaprop-P-ethyl                                                    | 200.0      | 0.827                                            | 71283-80-2  | 0                 |
| 130 | Spiroxamine                                                           | 33.0       | 0.826                                            | 118134-30-8 | 0                 |
| 131 | Benoxacor                                                             | 200.0      | 0.825                                            | 98730-04-2  | 0                 |
| 132 | Tributyltin methacrylate                                              | 0.8        | 0.824                                            | 2155-70-6   | 1                 |
| 133 | Dihexylamine                                                          | 200.0      | 0.824                                            | 143-16-8    | 0                 |
| 134 | Ethofumesate                                                          | 100.0      | 0.824                                            | 26225-79-6  | 0                 |
| 135 | Dimethyl maleate                                                      | 200.0      | 0.824                                            | 624-48-6    | 0                 |
| 136 | Cisplatin                                                             | 60.0       | 0.824                                            | 15663-27-1  | 0*                |
| 137 | Azinphos-methyl                                                       | 100.0      | 0.823                                            | 86-50-0     | 0*                |
| 138 | 4-Aminoazobenzene                                                     | 7.4        | 0.823                                            | 60-09-3     | 0                 |
| 139 | Octrizole                                                             | 200.0      | 0.823                                            | 3147-75-9   | 1                 |
| 140 | Dicyclohexylcarbodiimide                                              | 2.5        | 0.823                                            | 538-75-0    | 0*                |
| 141 | 4-Biphenylamine hydrochloride                                         | 7.4        | 0.822                                            | 2113-61-3   | 0                 |
| 142 | Phenazopyridine hydrochloride                                         | 200.0      | 0.822                                            | 136-40-3    | 1                 |
| 143 | Pyraclostrobin                                                        | 4.0        | 0.821                                            | 175013-18-0 | 1                 |
| 144 | Elzasonan                                                             | 7.4        | 0.821                                            | 361343-19-3 | 0                 |
| 145 | 4-Nonylphenol                                                         | 22.2       | 0.821                                            | 104-40-5    | 1                 |
| 146 | Methyl geranate                                                       | 200.0      | 0.820                                            | NOCAS_47129 | 0                 |
| 147 | Propanil                                                              | 100.0      | 0.820                                            | 709-98-8    | 1                 |
| 148 | 1-Dodecyl-2-pyrrolidinone                                             | 22.2       | 0.820                                            | 2687-96-9   | 0                 |
| 149 | Malathion                                                             | 100.0      | 0.819                                            | 121-75-5    | 0*                |
| 150 | Bithionol                                                             | 7.4        | 0.819                                            | 97-18-7     | 1                 |
| 151 | Pyriproxyfen                                                          | 33.0       | 0.819                                            | 95737-68-1  | 0                 |
| 152 | Cyprodinil                                                            | 33.0       | 0.818                                            | 121552-61-2 | 0                 |

| #   | Chemical                                    | Conc. [uM] | Pearson correlation with the mETC TFAP, <i>r</i> | CASRN       | MMP assay hitCall |
|-----|---------------------------------------------|------------|--------------------------------------------------|-------------|-------------------|
| 153 | Diphenylamine                               | 100.0      | 0.818                                            | 122-39-4    | 1                 |
| 154 | Anise oil                                   | 200.0      | 0.817                                            | 8007-70-3   | 0                 |
| 155 | Daminozide                                  | 100.0      | 0.817                                            | 1596-84-5   | 0                 |
| 156 | 2,4,6-Tribromophenol                        | 66.7       | 0.817                                            | 118-79-6    | 1                 |
| 157 | 2,5-Bis(2-methylbutan-2-yl)benzene-1,4-diol | 7.4        | 0.816                                            | 79-74-3     | 1                 |
| 158 | Spiromesifen                                | 200.0      | 0.816                                            | 283594-90-1 | 1                 |
| 159 | Kaempferol                                  | 60.0       | 0.816                                            | 520-18-3    | 1                 |
| 160 | Methyl 2-octynoate                          | 200.0      | 0.815                                            | 111-12-6    | 0                 |
| 161 | Etiozazole                                  | 10.6       | 0.815                                            | 153233-91-1 | 1                 |
| 162 | 2-(2-Ethoxyethoxy)ethyl prop-2-enoate       | 200.0      | 0.815                                            | 7328-17-8   | 0                 |
| 163 | Loratadine                                  | 20.0       | 0.814                                            | 79794-75-5  | 1                 |
| 164 | 2,4-Hexadienyl isobutyrate                  | 200.0      | 0.812                                            | 16491-24-0  | 0                 |
| 165 | Diethylstilbestrol                          | 22.2       | 0.812                                            | 56-53-1     | 1                 |
| 166 | Triadimefon                                 | 100.0      | 0.812                                            | 43121-43-3  | 0                 |
| 167 | Bromoxynil                                  | 100.0      | 0.811                                            | 1689-84-5   | 1                 |
| 168 | Tributyltin chloride                        | 0.3        | 0.811                                            | 1461-22-9   | 1                 |
| 169 | Rhodamine B                                 | 200.0      | 0.810                                            | 81-88-9     | 0                 |
| 170 | Triphenyl phosphate                         | 66.7       | 0.810                                            | 115-86-6    | 1                 |
| 171 | Lovastatin                                  | 66.7       | 0.810                                            | 75330-75-5  | 1                 |
| 172 | 4,4'-Dichlorodiphenyl sulfone               | 200.0      | 0.810                                            | 80-07-9     | 1                 |
| 173 | Bis[4-(glycidyloxy)phenyl]methane           | 22.2       | 0.810                                            | 2095-03-6   | 0                 |
| 174 | N,N-Dimethyl-4-nitrosoaniline               | 7.4        | 0.810                                            | 138-89-6    | 0                 |
| 175 | Mepronil                                    | 200.0      | 0.810                                            | 55814-41-0  | 1                 |
| 176 | Tacrine                                     | 60.0       | 0.810                                            | 321-64-2    | 0*                |
| 177 | Didecylidimethylammonium chloride           | 2.5        | 0.809                                            | 7173-51-5   | 1                 |
| 178 | Formetanate hydrochloride                   | 100.0      | 0.809                                            | 23422-53-9  | 0                 |
| 179 | Pentachlorophenol                           | 66.7       | 0.808                                            | 87-86-5     | 1                 |
| 180 | Nitrofurantoin                              | 180.0      | 0.808                                            | 67-20-9     | 1                 |
| 181 | Metsulfuron-methyl                          | 100.0      | 0.808                                            | 74223-64-6  | 0                 |
| 182 | Eugenyl phenylacetate                       | 200.0      | 0.807                                            | 10402-33-2  | 0                 |
| 183 | Sodium 2-phenylphenate tetrahydrate         | 66.7       | 0.807                                            | 6152-33-6   | 1                 |
| 184 | Tris(2,3-dibromopropyl) phosphate           | 22.2       | 0.806                                            | 126-72-7    | 1                 |
| 185 | Fenazaquin                                  | 0.2        | 0.806                                            | 120928-09-8 | 0*                |
| 186 | Clomipramine hydrochloride                  | 22.2       | 0.806                                            | 17321-77-6  | 0*                |
| 187 | Pyrimethanil                                | 100.0      | 0.806                                            | 53112-28-0  | 0                 |
| 188 | Piperonyl butoxide                          | 100.0      | 0.805                                            | 51-03-6     | 0                 |
| 189 | 1-Chloro-2-(chloromethyl)-3-fluorobenzene   | 22.2       | 0.804                                            | 55117-15-2  | 0                 |
| 190 | 3-Hydroxyfluorene                           | 66.7       | 0.804                                            | 6344-67-8   | 1                 |
| 191 | 2-Methoxy-4-methylphenol                    | 200.0      | 0.803                                            | 93-51-6     | 0                 |
| 192 | Forchlorfenuron                             | 100.0      | 0.802                                            | 68157-60-8  | 1                 |
| 193 | 2-(Chloromethyl)pyridine hydrochloride      | 200.0      | 0.801                                            | 6959-47-3   | 0                 |
| 194 | Benfluralin                                 | 100.0      | 0.801                                            | 1861-40-1   | 0                 |
| 195 | Desmedipham                                 | 200.0      | 0.801                                            | 13684-56-5  | 1                 |
| 196 | Benzylidimethyldodecylammonium chloride     | 7.4        | 0.801                                            | 139-07-1    | 1                 |
| 197 | Flumioxazin                                 | 100.0      | 0.800                                            | 103361-09-7 | 0                 |
| 198 | 3,3'-Diaminobenzidine                       | 200.0      | 0.800                                            | 91-95-2     | 1                 |
| 199 | 8-Hydroxyquinoline                          | 200.0      | 0.800                                            | 148-24-3    | 0                 |
